# Supplementary material for: MSH2 stimulates interfering and inhibits non-interfering crossovers in response to genetic polymorphism
Source: PubMed Central journal article supplement (PMC10593791; doi:10.1038/s41467-023-42511-z), 2023-10-23
Supplement: 41467_2023_42511_MOESM1_ESM.pdf [file 41467_2023_42511_MOESM1_ESM.pdf]

# **MSH2 stimulates interfering and inhibits non-interfering crossovers in response to genetic polymorphism**

Julia Dluzewska, Wojciech Dziegielewski, Maja Szymanska-Lejman, Monika Gazecka,  
Ian R. Henderson, James Higgins and Piotr A. Ziolkowski

**Supplementary Information**

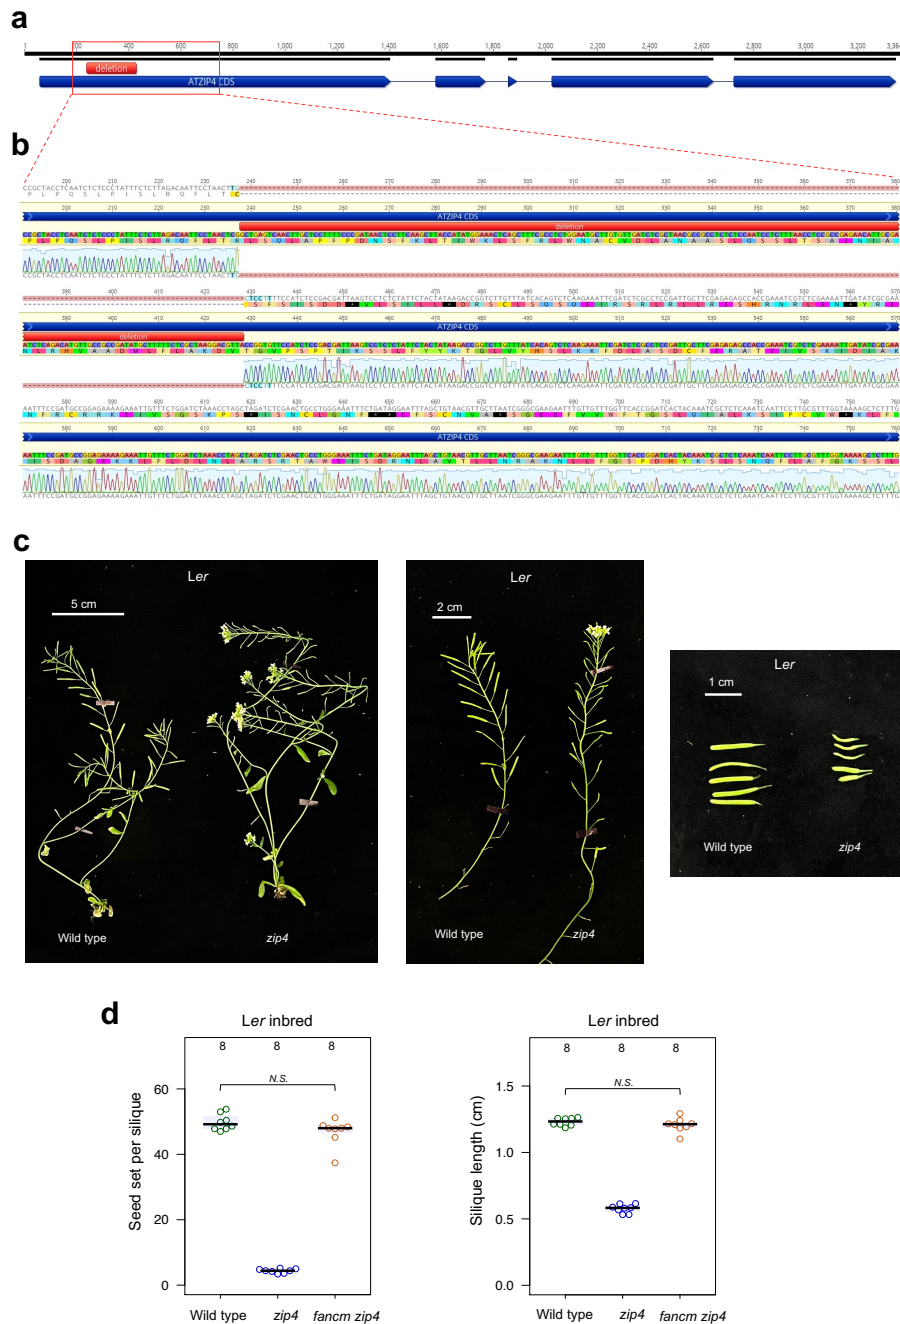

**Supplementary Fig. 1. ZIP4 CRISPR/Cas9-mediated mutagenesis in Ler accession.** **a**, ZIP4 coding sequence with exons represented in dark blue arrows. Mutagenesis by CRISPR/Cas9 resulted in 191 bp deletion within the first exon (annotated as a red square) and introduction of 5 SNPs within the Cas9 cutting sites. **b**, Close-up view of the *Ler zip4* sequencing aligned to the wild-type reference shows that the 191 bp deletion results in a frameshift and multiple STOP codons, represented in black. **c**, The *Ler zip4* mutant obtained by CRISPR/Cas9 shows dramatically reduced fertility. Whole plants (left) are shown next to primary shoots (center) and exemplary siliques (right). **d**, Fertility assays in *Ler zip4* and *fancm zip4* as assessed via seed set and silique length. The center line of a boxplot indicates the mean; the upper and lower bounds indicate the 75th and 25th percentiles, respectively. Each dot represents a measurement from five siliques of one plant. The numbers of plants are indicated above the boxplots. Significance was assessed by Welch's *t*-test. Source data are provided as a Source Data file.

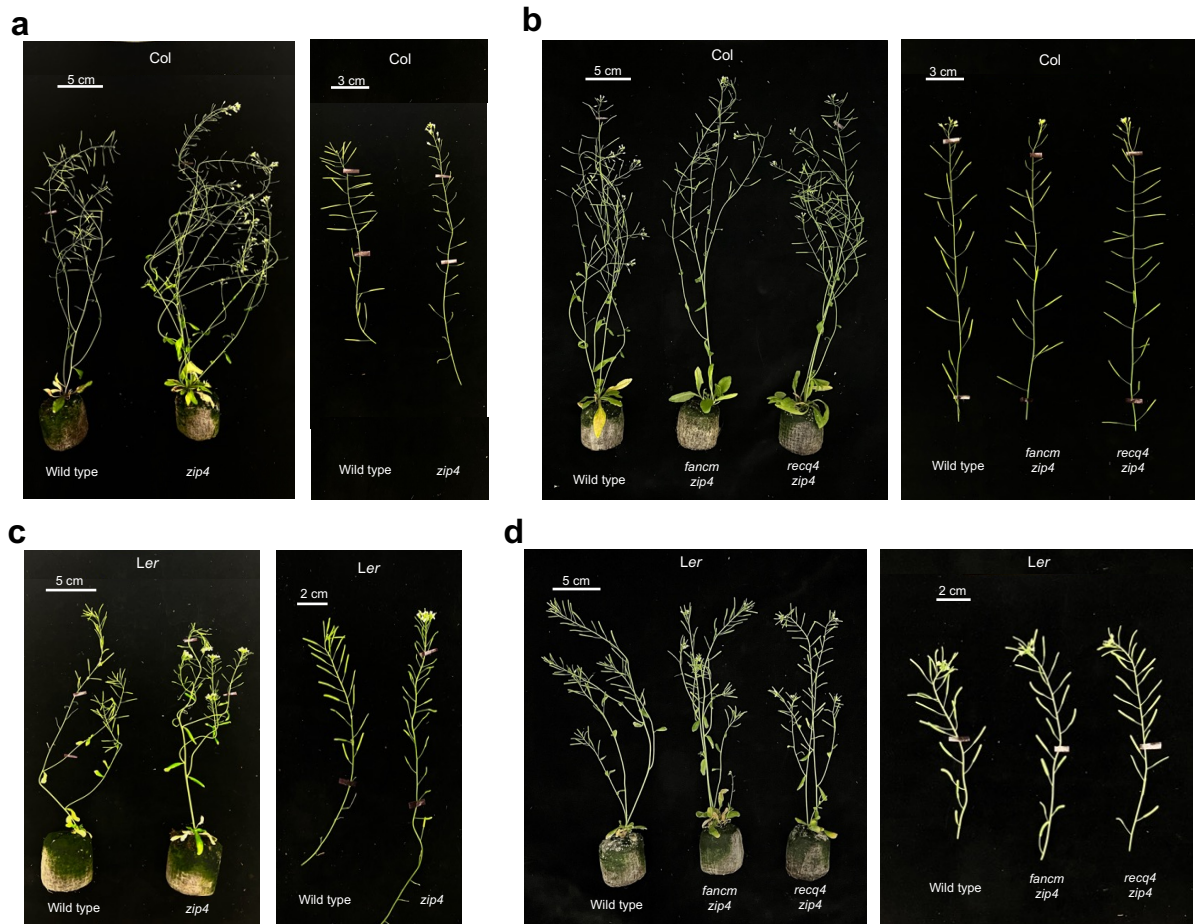

**Supplementary Fig. 2.** Fertility, which is lost in Col and Ler *zip4* mutants, is restored in *fancm* or *recq4* (*recq4a recq4b*) mutant backgrounds. **a**, comparison of wild type and *zip4* plants (left) and shoots (right) in Col background. **b**, as in **a**, but for the *fancm zip4* and *recq4 zip4* mutants. **c**, as in **a**, but in the Ler background. **d**, as in **a**, but for the *fancm zip4* and *recq4 zip4* mutants in Ler background.

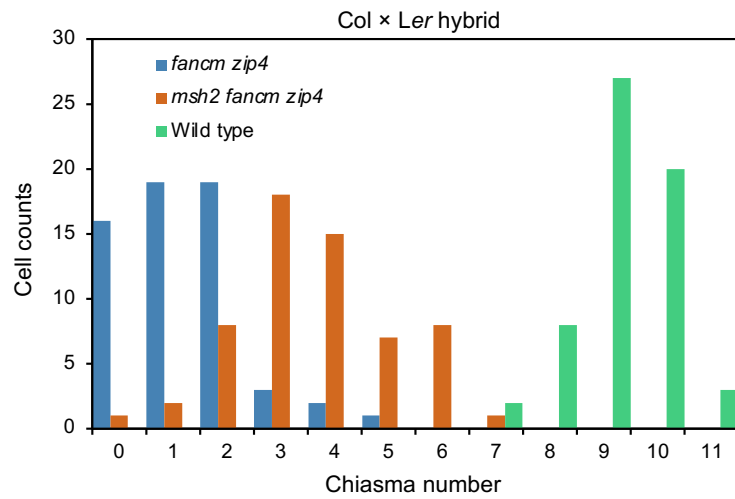

**Supplementary Fig. 3.** Quantification of chiasma count data from Col × Ler male meiocytes in wild type, *fancm zip4* and *msh2 fancm zip4*. Source data are provided as a Source Data file.

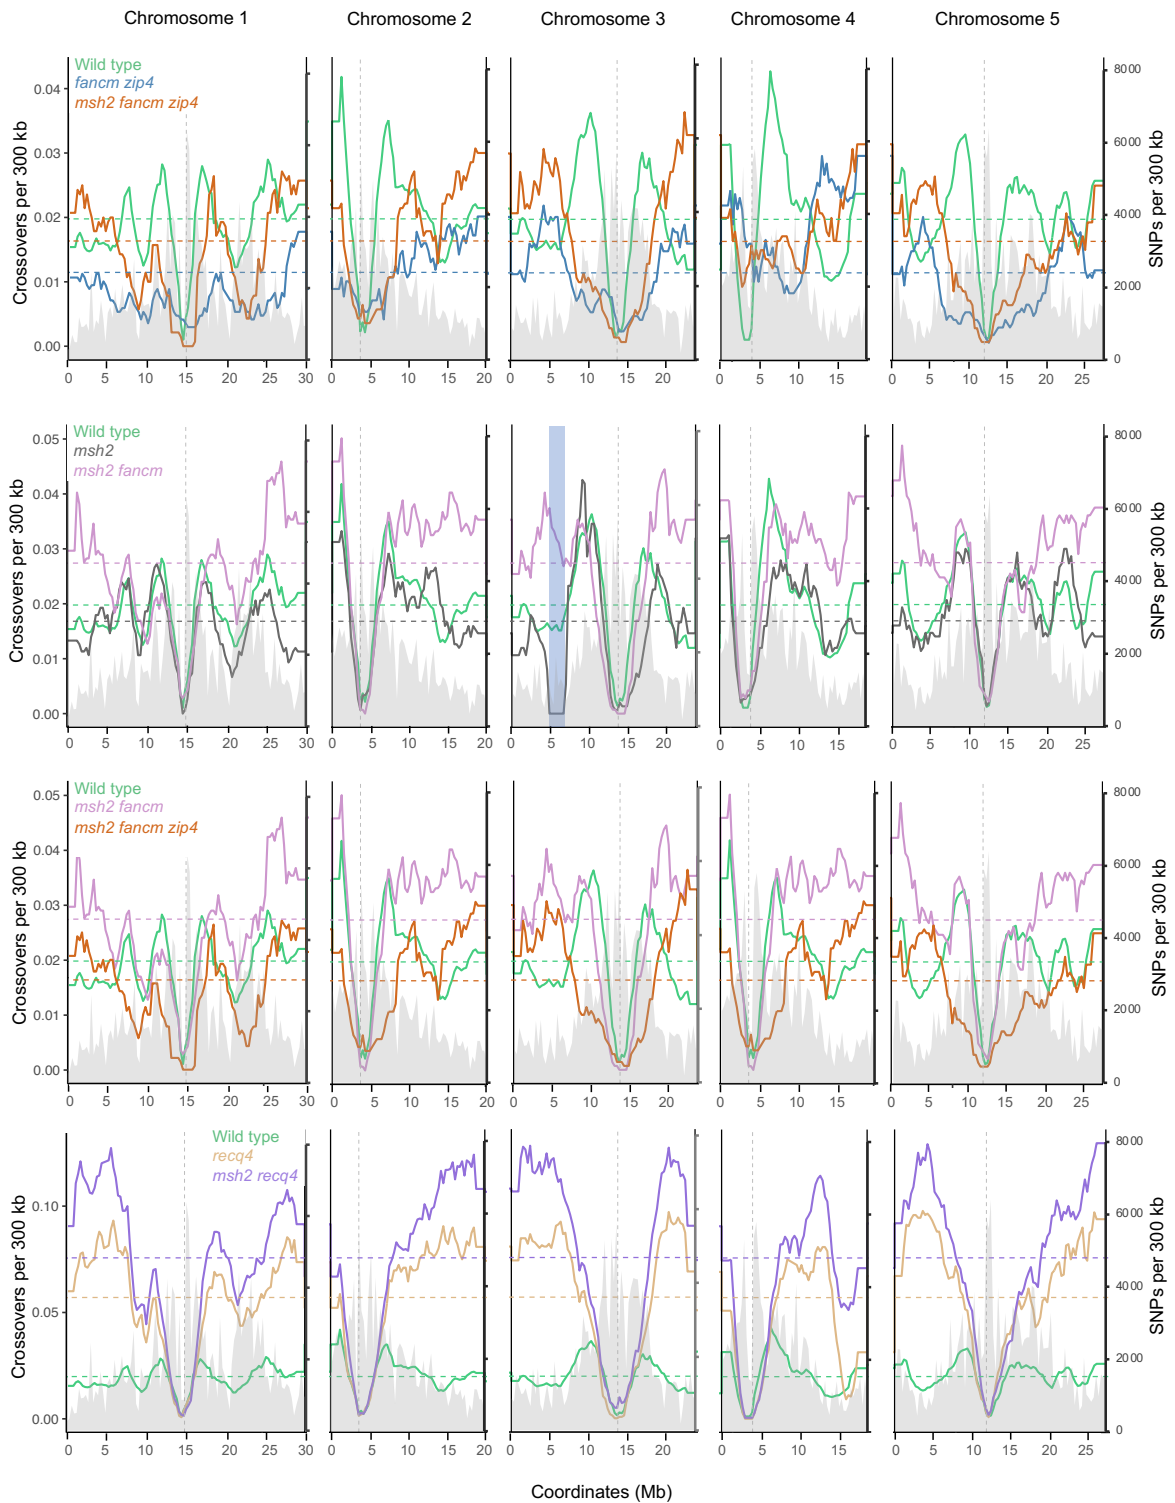

**Supplementary Fig. 4.** Crossovers per 300 kb per  $F_2$  plotted along the Arabidopsis chromosomes. Mean values are shown by horizontal dashed lines. SNPs per 300 kb are plotted and shaded in gray. The position of centromeres is indicated as vertical dashed line. The introgression of Col in *msh2* Ler due to *msh2* backcrossing results in failure to detect crossovers, which is indicated as a blue rectangle. Source data are provided as a Source Data file.

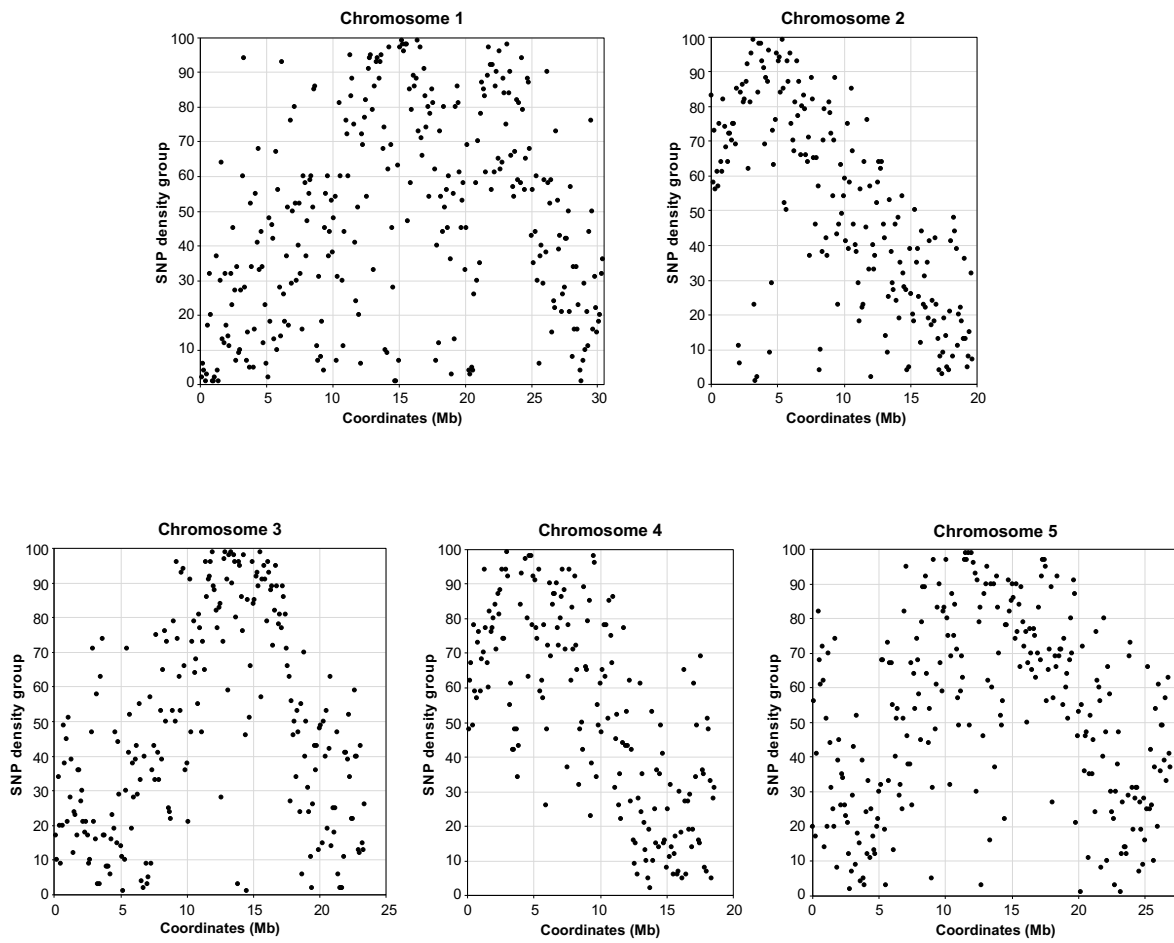

**Supplementary Fig. 5.** Chromosomal distribution of 100 kb windows for each SNP density group used in Figure 3. Each dot corresponds to one window, each group (Y-axis) consists of 12 windows. Source data are provided as a Source Data file.

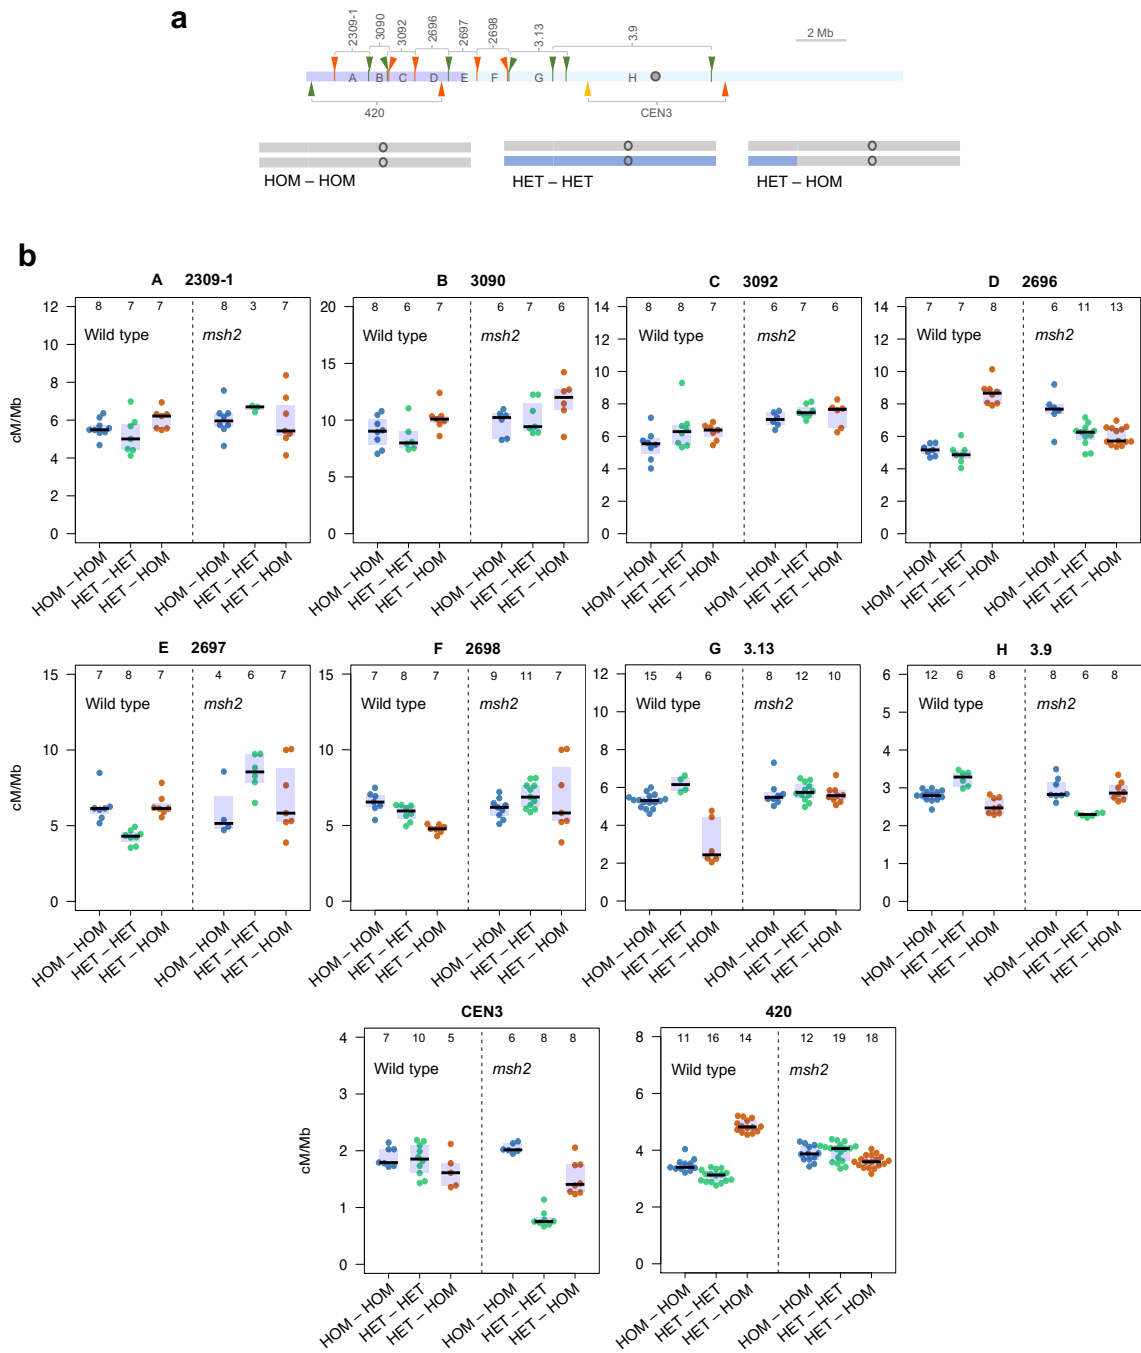

**Supplementary Fig. 6.** Crossover distribution across the chromosome arm in response to polymorphism. The plots show the same data as in Figure 5, but separately for each FTL. **a**, Location of eight FTL intervals across the Arabidopsis chr. 3 shown in addition to 420 and *CEN3* intervals. Fluorescent reporters are indicated by tick marks and arrowheads with colors corresponding to eGFP (green), dsRed (red) and eYFP (yellow). The violet and light blue shading represents ‘HET’ and ‘HOM’ regions in HET-HOM line, respectively. Genetically defined centromere<sup>1</sup> is indicated as gray circle. Below, ideograms of chr. 3 showing heterozygosity pattern in lines used in **b**. Gray and blue correspond to Col and Ct genotype, respectively. **b**, Crossover frequency (cM/Mb) in the HOM-HOM, HET-HET and HET-HOM genotypes shown separately for ten FTLs, in either wild type or *msh2*. The center line of a boxplot indicates the mean; the upper and lower bounds indicate the 75th and 25th percentiles, respectively. Each dot represents a measurement from one individual. The numbers of individuals are indicated above the boxplots. Source data are provided as a Source Data file.

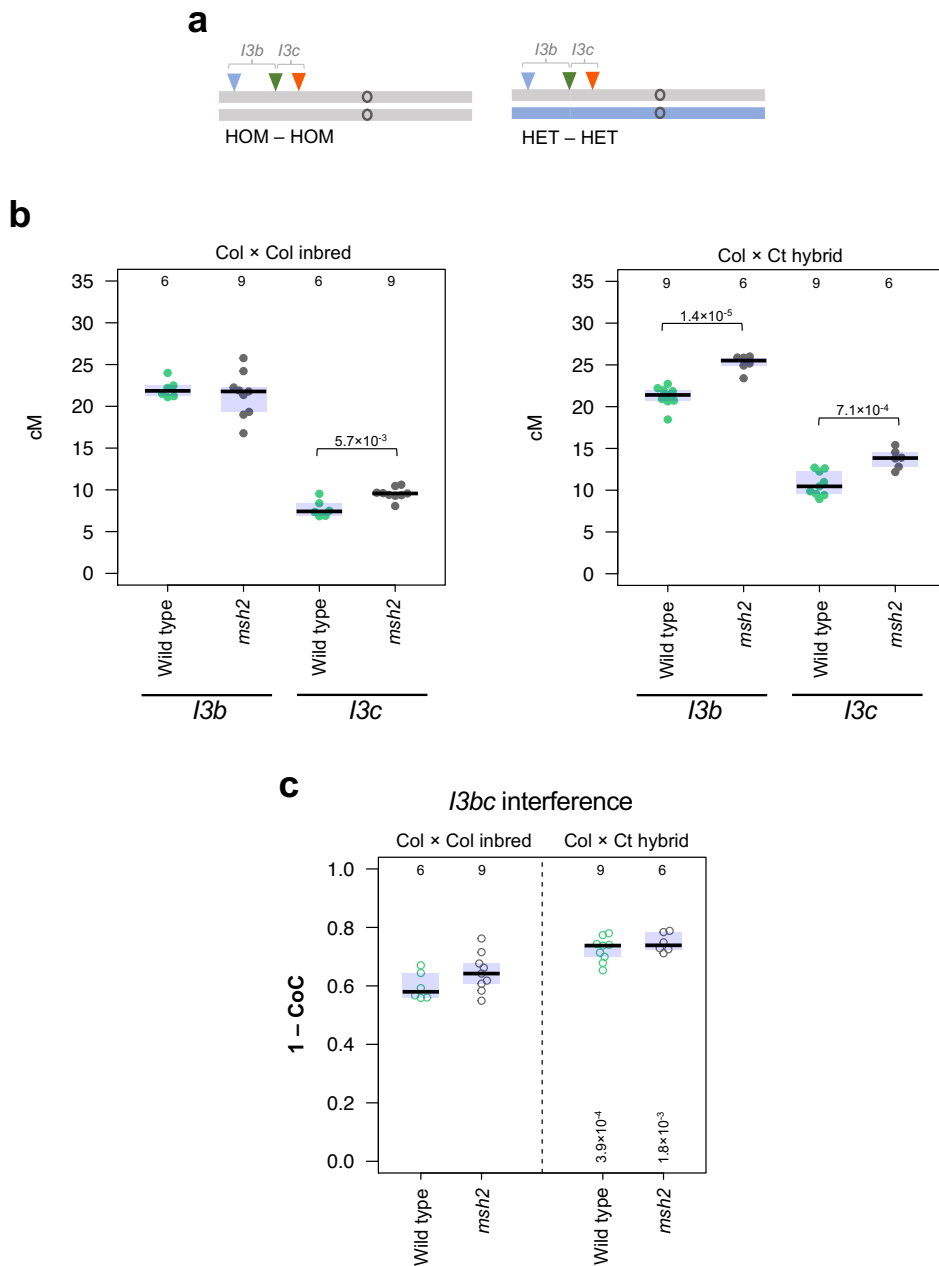

**Supplementary Fig. 7.** Crossover interference is not changed in *msh2* inbreds and hybrids. **a**, Ideograms of chromosome 3 showing the location of *I3b* and *I3c* intervals in Col/Col inbred and Col/Ct hybrid plants used in the experiment. Gray corresponds to Col while blue corresponds to Ct genotype. Location of fluorescent reporters defining *I3b* and *I3c* interval is indicated by blue, green and red triangles. **b**, *I3b* and *I3c* crossover rate as measured in Col/Col inbred and Col/Ct hybrid plants as measured in wild type and *msh2* plants. Welch's t-test was used to calculate statistical significance. **c**, Crossover interference (1 – CoC) as measured over *I3bc* intervals for Col/Col inbred and Col/Ct hybrid plants in wild type and *msh2* plants. Two-sided *P* values indicate the statistical difference in crossover interference in hybrids versus inbreds (Welch's t-test). Each dot on **b** and **c** represents a measurement from a pool of 5-8 individuals. The numbers of pools are indicated above the boxplots. Source data are provided as a Source Data file.



**Supplementary Table 1.** List of oligonucleotides.

| ID            | Primer sequence                         | Comments                                                                           |
|---------------|-----------------------------------------|------------------------------------------------------------------------------------|
| JZ-001        | TTAAACTCACTTGGCAATCGC                   | <i>msh2-1</i> SALK mutant in Col, use together with LBb1.3                         |
| JZ-002        | TAAGCTTTGCTGATTTGGCTG                   |                                                                                    |
| JZ-14         | AACCACTGCTCTACGTCAGC                    | <i>msh2</i> CRISPR/Cas9 deletion mutants genotyping                                |
| JZ-15         | TCGCTTCAGATGCTGTCTAA                    |                                                                                    |
| zip4-F        | TTGCTACCTTGGGCTCTCTC                    | <i>zip4-2</i> SALK mutant in Col, use together with LBb1.3                         |
| zip4-R        | ATTCTGTTCTCGCTTTCCAG                    |                                                                                    |
| zip4_CRISPR_F | TCTCCCGCCAACAATCGAAA                    | <i>zip4-3</i> CRISPR/Cas9 deletion mutant genotyping in <i>Ler</i>                 |
| zip4_CRISPR_R | CTGCAATCGTCGTCACCTCT                    |                                                                                    |
| fanm-dCAPS-F  | ACAATATATGTTTCGTGCAGGTAAGA<br>CATTGGAAG | <i>fanm-1</i> mutant in Col, dCAPS primers: digestion with MbolI enzyme            |
| fanm-dCAPS-R  | CACCAATAGATGTTGCGACAAT                  |                                                                                    |
| fanm-Ler-L    | GCTTGGTGATCGACGAGGCACATCAA<br>G         | <i>fanm-10</i> mutant in <i>Ler</i> , dCAPS primers: digestion with HindIII enzyme |
| fanm-Ler-R    | ATTAGTTGGTCACCTTGATCAT                  |                                                                                    |
| recq4a-F      | ATCAGAGCCACTCATTGTTG                    | <i>recq4a-4</i> mutant in Col, multiplex PCR                                       |
| recq4a-wt-R   | GTCCTGATCGTGTTGGACAG                    |                                                                                    |
| recq4a-mut-R  | ATATTGACCATCATACTCATTGC                 |                                                                                    |
| recq4b-wt-F   | TCAGAAAGTTGCTCTGCGTC                    | <i>recq4b-2</i> wild type allele in Col                                            |
| recq4b-wt-R   | ACCAAGACCCTGCATATTGC                    |                                                                                    |
| recq4b-mut-F  | ACTAGAGATACTTCAGGAGCTGAGC               | <i>recq4b-2</i> mutant allele in Col                                               |
| recq4b-mut-R  | GCTTTCTTCCCTTCCTTTCTC                   |                                                                                    |
| recq4a_Ler_F  | GACCAAGGCAGATATGCCTGTGATAC<br>CTG       | <i>recq4a</i> mutant in <i>Ler</i> , dCAPS primers: digestion with ScrFI enzyme    |
| recq4a_Ler_R  | GTCCAGGGAAATTCACGACTGGTC                |                                                                                    |
| LBb1.3        | ATTTTGCCGATTTTCGGAAC                    | Universal primer for SALK mutants                                                  |
| HEI10_C2_F    | TAATACGACTCACTATAGGG                    | Genotyping of <i>HEI10-OE</i> construct presence in C2 line                        |
| HEI10_C2_R    | GCCAGCAAGACAGAACAGTTC                   |                                                                                    |
| ZIP4-gRNA1    | AAGTTGACTCAGCCGAGTT                     | gRNAs binding within 1st exon of <i>ZIP4</i>                                       |
| ZIP4-gRNA2    | AATCGTCGGAGATGGAACAC                    |                                                                                    |

**Supplementary Table 2.** Characteristics of a CTL panel (2309-1, 3090, 3092, 2696, 2697, 2698, 3.13, 3.9) overlapping norther arm and centromeric region of chromosome 3. CTLs were created by Wu et al. (2015).

| CTL name | Size (Mb) | Single-color reporter line |        | Coordinates (bp) |            |
|----------|-----------|----------------------------|--------|------------------|------------|
|          |           | Left                       | Right  | Left             | Right      |
| 2309-1   | 1.36      | CR92                       | CG50   | 1 171 464        | 2 528 742  |
| 3090     | 0.77      | CG50                       | CR352  | 2 528 742        | 3 300 254  |
| 3092     | 1.05      | CG21                       | CR73   | 3 280 460        | 4 330 342  |
| 2696     | 1.27      | CR73                       | CG24   | 4 330 342        | 5 603 768  |
| 2697     | 1.16      | CG24                       | CR1045 | 5 603 768        | 6 761 383  |
| 2698     | 1.26      | CR1045                     | CG43   | 6 761 383        | 8 017 809  |
| 3.13     | 2.25      | CR729                      | CG906  | 8 072 294        | 10 318 203 |
| 3.9      | 6.24      | CG17                       | CR55   | 9 741 508        | 15 980 483 |

**Supplementary Table 3.** Summary of the GBS libraries and crossovers identified. Data for *fancm zip4*, *msh2 fancm*, *msh2 fancm zip4* and *msh2 recq4*, where generated in this work, while data for wild type, *msh2* and *recq4* mutants were adopted from previously published reports (references indicated next to genotype name).

| Genotype                  | Total crossover number | Total reads | No. of samples | Avg. reads per library | Avg. coverage per library |
|---------------------------|------------------------|-------------|----------------|------------------------|---------------------------|
| <i>fancm zip4</i>         | 1,061                  | 109,121,099 | 232            | 470,349                | 1.23                      |
| <i>msh2 fancm</i>         | 1,976                  | 117,537,405 | 201            | 584,763                | 0.93                      |
| <i>msh2 fancm zip4</i>    | 1,324                  | 69,456,952  | 184            | 377,483                | 1.81                      |
| <i>msh2 recq4</i>         | 8,573                  | 196,367,255 | 283            | 693,877                | 1.40                      |
| Wild type <sup>2</sup>    | 14,998                 | 518,905,436 | 1859           | 279,131                | 0.73                      |
| <i>msh2</i> <sup>3</sup>  | 1,278                  | 100,524,854 | 188            | 534,707                | 1.39                      |
| <i>recq4</i> <sup>4</sup> | 4,389                  | 115,931,182 | 192            | 603,808                | 1.58                      |

#### Supplementary references

1. Copenhaver, G. P. *et al.* Genetic definition and sequence analysis of Arabidopsis centromeres. *Science* **286**, 2468–74 (1999).
2. Rowan, B. A. *et al.* An Ultra High-Density Arabidopsis thaliana Crossover. *Genetics* **213**, 771–787 (2019).
3. Blackwell, A. R. *et al.* MSH2 shapes the meiotic crossover landscape in relation to interhomolog polymorphism in Arabidopsis. *EMBO J.* **39**, e104858 (2020).
4. Serra, H. *et al.* Massive crossover elevation via combination of HEI10 and *recq4a recq4b* during Arabidopsis meiosis. *Proc Natl Acad Sci U S A* **115**, 2437–2442 (2018).
